# Supplementary material for: Genotyping strategy matters when analyzing hypervariable major histocompatibility complex‐Experience from a passerine bird
Source: PubMed Central journal article supplement (PMC5792522; doi:10.1002/ece3.3757), 2018-01-07
Supplement: ECE3-8-1680-s004.pdf [file ECE3-8-1680-s004.pdf]

# PRIMER BINDING SITES

## MHCI

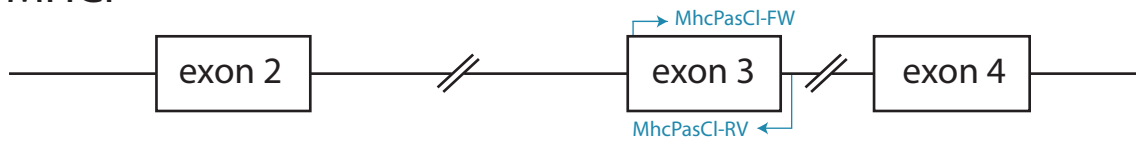

## MHCII

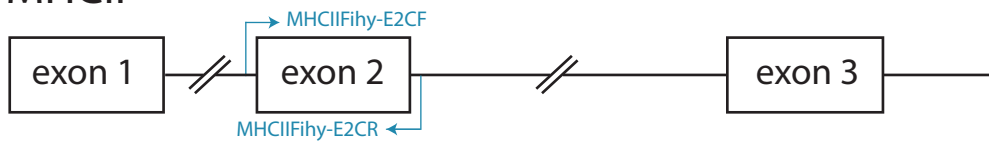

Modified from Alcaide *et al.* (2013; MHC I) and Canal *et al.* (2010; MHC II)
