# Supplementary material for: Genotyping strategy matters when analyzing hypervariable major histocompatibility complex‐Experience from a passerine bird
Source: PubMed Central journal article supplement (PMC5792522; doi:10.1002/ece3.3757), 2018-01-07

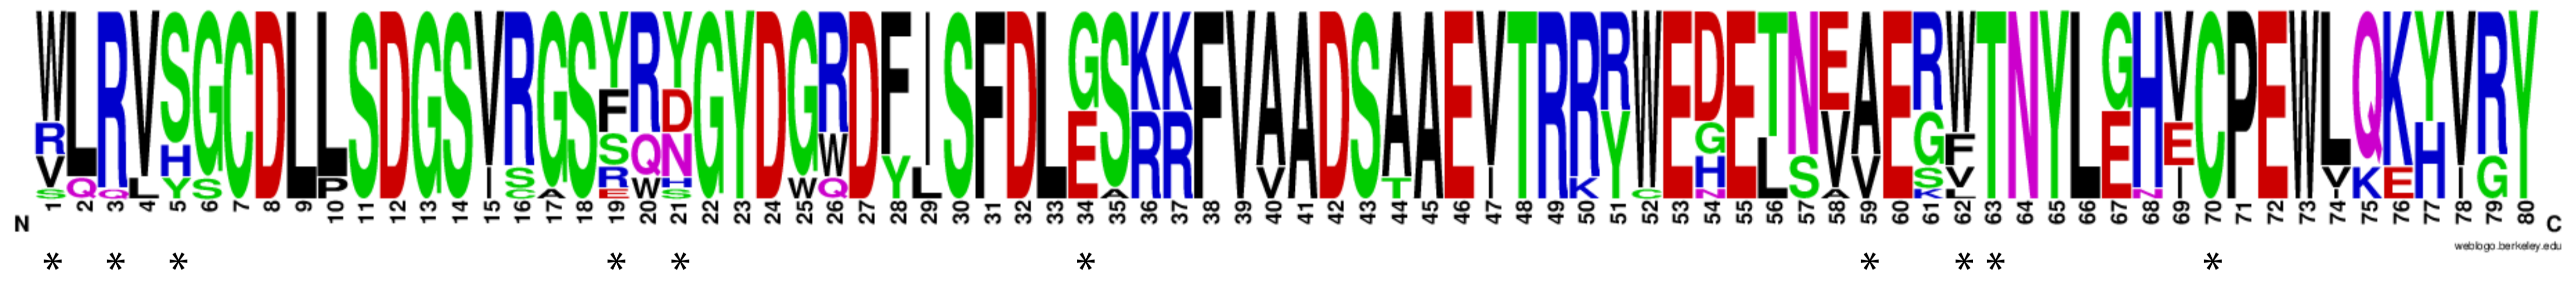

Supplement: ECE3-8-1680-s008.pdf [file ECE3-8-1680-s008.pdf]
