# Supplementary material for: Genotyping strategy matters when analyzing hypervariable major histocompatibility complex‐Experience from a passerine bird
Source: PubMed Central journal article supplement (PMC5792522; doi:10.1002/ece3.3757), 2018-01-07

## AmpliSAS

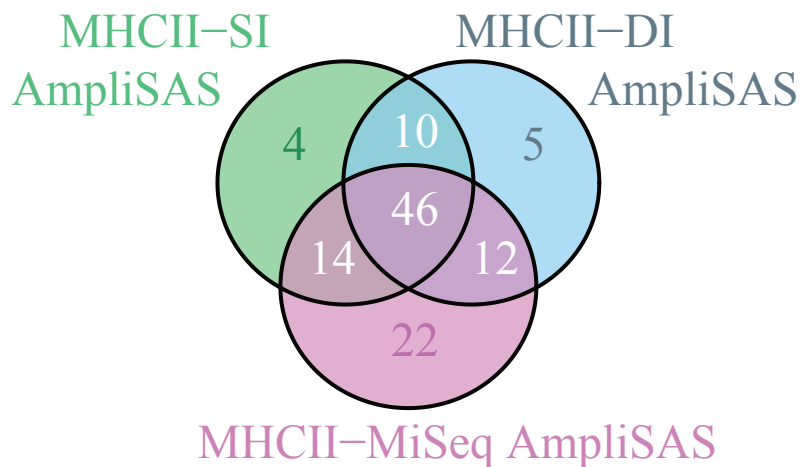

## Modified Sommer pipeline

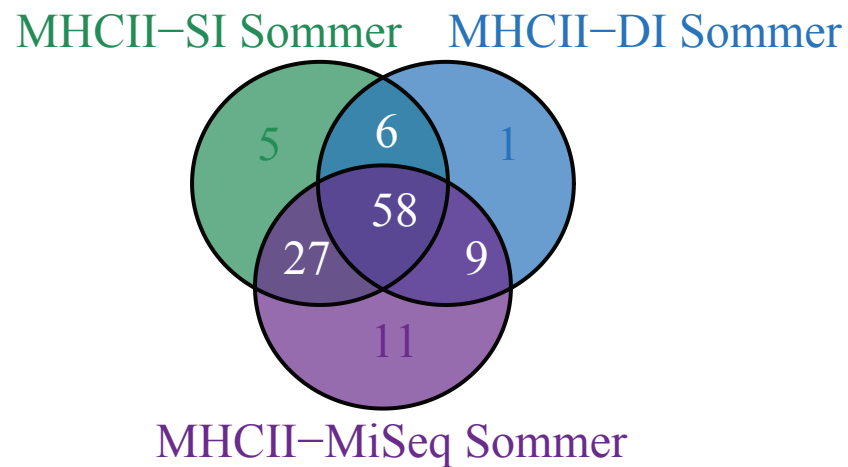

## MHCII-MiSeq Alleles

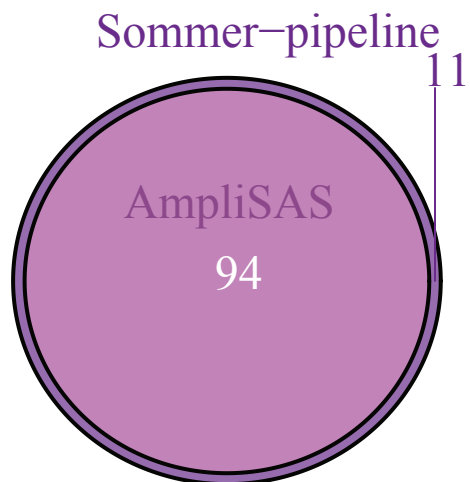

## MHCII IonTorrent Alleles

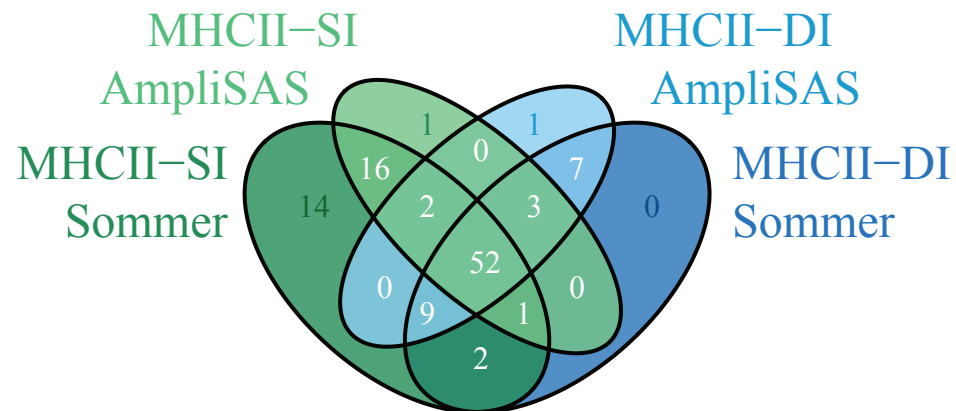

Supplement: ECE3-8-1680-s013.pdf [file ECE3-8-1680-s013.pdf]
